# Supplementary material
Source: publisher figshare collection journal article supplement (https://future-science-group.figshare.com/articles/dataset/_/21221024)
Supplement: Supplementary file 1 [file 1]

# Supplementary Material

## Supplementary Methods

### PubMed search strategy

For the PubMed search, the following combination of key words were used: ("epigenomic*"[MeSH Terms] OR "epigenomic*"[Title/Abstract] OR "epigenetic*"[Title/Abstract] OR "methylation"[Title/Abstract] OR "histone modification"[Title/Abstract] OR "s-adenosylmethionine"[Title/Abstract] OR "CpG island"[Title/Abstract] OR (("histone*"[Title/Abstract] OR "dna"[Title/Abstract] OR "long interspersed"[Title/Abstract]) AND ("acetylat*"[Title/Abstract] OR "deacetylat*"[Title/Abstract] OR "demethylat*"[Title/Abstract] OR "methylat*"[Title/Abstract] OR "phosphorylat*"[Title/Abstract] OR "ubiquitinat*"[Title/Abstract] OR "modif*"[Title/Abstract])) OR "chromatin remodel*"[Title/Abstract] OR "CpG"[Title/Abstract] OR "epigenom*"[Title/Abstract] OR "epigenesis"[Title/Abstract] OR "methylom*"[Title/Abstract] OR "methylat*"[Title/Abstract] OR "microRNA"[Title/Abstract] OR "miRNA"[Title/Abstract] OR "siRNA"[Title/Abstract] OR "piRNA"[Title/Abstract] OR "sncRNA"[Title/Abstract] OR "IncRNA"[Title/Abstract] OR (("non-coding"[Title/Abstract] OR "untranslated"[Title/Abstract]) AND "RNA"[Title/Abstract])) AND ("uterine cervical neoplasms"[MeSH Terms] OR ("uterine"[Title/Abstract] AND ("cervical"[Title/Abstract] OR "cervix"[Title/Abstract]) AND ("neoplasms"[Title/Abstract] OR "tumour"[Title/Abstract] OR "tumor"[Title/Abstract] OR "cancer"[Title/Abstract] OR "malignancy"[Title/Abstract] OR "carcinoma"[Title/Abstract] OR "adenocarcinoma"[Title/Abstract])) OR "uterine cervical neoplasms"[Title/Abstract] OR "uterine cervical tumour"[Title/Abstract] OR "uterine cervical tumor"[Title/Abstract] OR "uterine cervical malignancy"[Title/Abstract] OR "uterine cervical carcinoma"[Title/Abstract] OR "uterine cervical adenocarcinoma"[Title/Abstract] OR "uterine cervical cancer"[Title/Abstract] OR "uterine cervix neoplasms"[Title/Abstract] OR "uterine cervix tumour"[Title/Abstract] OR "uterine cervix tumor"[Title/Abstract] OR "uterine cervix malignancy"[Title/Abstract] OR "uterine cervix carcinoma"[Title/Abstract] OR "uterine cervix adenocarcinoma"[Title/Abstract] OR "uterine cervix cancer"[Title/Abstract] OR "cervical neoplasms"[Title/Abstract] OR "cervical tumour"[Title/Abstract] OR "cervical tumor"[Title/Abstract] OR "cervical malignancy"[Title/Abstract] OR "cervical carcinoma"[Title/Abstract] OR "cervical adenocarcinoma"[Title/Abstract] OR "cervical cancer"[Title/Abstract] OR "cervix neoplasms"[Title/Abstract] OR "cervix tumour"[Title/Abstract] OR "cervix tumor"[Title/Abstract] OR "cervix malignancy"[Title/Abstract] OR "cervix carcinoma"[Title/Abstract] OR "cervix adenocarcinoma"[Title/Abstract] OR "cervix cancer"[Title/Abstract] OR (("cervical"[Title/Abstract] OR "cervix"[Title/Abstract]) AND ("cancer"[Title/Abstract] OR "neoplasm"[Title/Abstract] OR "tumour"[Title/Abstract] OR "tumor"[Title/Abstract] OR "malignancy"[Title/Abstract] OR "carcinoma"[Title/Abstract] OR "adenocarcinoma"[Title/Abstract]))) AND ("biomarker*s"[Title/Abstract] OR "biomarkers"[MeSH Terms] OR "biological marker*"[Title/Abstract] OR "biomarker"[Title/Abstract]).

### Embase search strategy

For the Embase search, the following combination of key words were used: ('epigeneticss'/exp OR 'epigenetics' OR 'epigenetic' OR 'epigenomic' OR 'epigenomics'OR 'methylation'/exp OR 'histone modification'/exp OR 's-adenosylmethionine'/exp OR 'CpG island'/exp OR (((‘histone*’ OR ‘dna’ OR 'long interspersed') AND (‘acetylat*’ OR ‘deacetylat*’ OR ‘demethylat*’ OR ‘methylat*’ OR ‘phosphorylat*’ OR ‘ubiquitinat*’ OR ‘modif*’)) OR 'chromatin remodel*' OR 's-adenosylmethionine' OR ‘cpg’ OR ‘epigenetic*’ OR ‘epigenom*’ OR ‘epigenesis’ OR ‘methylom*’ OR ‘methylat*’ OR ‘microRNA’ OR ‘miRNA’ OR ‘siRNA’ OR ‘piRNA’ OR ‘sncRNA’ OR ‘IncRNA’):ab,kw,ti OR ((‘non-coding’ OR ‘untranslated’) AND ‘RNA’):ab,kw,ti) AND ('uterine cervix tumour'/exp OR ('uterine cervix tumour' OR 'uterine cervical tumour' OR 'uterine cervix tumor' OR 'uterine cervical tumor' OR 'uterine cervix malignancy' OR 'uterine cervical malignancy' OR 'uterine cervix carcinoma' OR 'uterine cervical carcinoma' OR 'uterine cervix adenocarcinoma' OR 'uterine cervical adenocarcinoma' OR 'uterine cervix neoplasm' OR 'uterine cervical neoplasm' OR 'uterine cervix cancer' OR 'uterine cervical cancer' OR 'cervix tumour' OR 'cervical tumour' OR 'cervix tumor' OR 'cervical tumor' OR 'cervix malignancy' OR 'cervical malignancy' OR 'cervix carcinoma' OR 'cervical carcinoma' OR 'cervix adenocarcinoma' OR 'cervical adenocarcinoma' OR 'cervix neoplasm' OR 'cervical neoplasm' OR 'cervix cancer' OR 'cervical cancer' OR ('uterine' AND ('cervix' OR 'cervical') AND ('cancer' OR 'tumour' OR 'tumor' OR 'neoplasm')) OR (('cervix' OR 'cervical') AND ('cancer' OR 'tumour' OR 'tumor' OR 'neoplasm' OR 'malignancy' OR 'carcinoma' OR 'adenocarcinoma'))):ab,kw,ti) AND ('biomarkerss'/exp OR ('biomarker*s' OR 'biomarker' OR 'biological marker*'):ab,kw,ti).

### Web of Science search strategy

For the Web of Science search, the following combination of key words were used: ((epigenetic*) OR (methylation) OR (histone modification) OR (s-adenosylmethionine) OR (CpG island) OR (((histone*) OR (dna) OR (long interspersed)) AND ((acetylat*) OR (deacetylat*) OR (demethylat*) OR (methylat*) OR (phosphorylat*) OR (ubiquitinat*) OR (modif*))) OR (chromatin remodel*) OR (cpg) OR (epigenom*) OR (epigenesis) OR (methylom*) OR (methylat*) OR (microRNA) OR (miRNA) OR (siRNA) OR (piRNA) OR (sncRNA) OR (IncRNA) OR (((non-coding) OR (untranslated)) AND (RNA))) AND ((uterine cervix tumour) OR (uterine cervical tumour) OR (uterine cervix tumor) OR (uterine cervical tumor) OR (uterine cervix malignancy) OR (uterine cervical malignancy) OR (uterine cervix carcinoma) OR (uterine cervical carcinoma) OR (uterine cervix adenocarcinoma) OR (uterine cervical adenocarcinoma) OR (uterine cervix neoplasm) OR (uterine cervical neoplasm) OR (uterine cervix cancer) OR (uterine cervical cancer) OR (cervix tumour) OR (cervical tumour) OR (cervix tumor) OR (cervical tumor) OR (cervix malignancy) OR (cervical malignancy) OR (cervix carcinoma) OR (cervical carcinoma) OR (cervix adenocarcinoma) OR (cervical adenocarcinoma) OR (cervix neoplasm) OR (cervical neoplasm) OR (cervix cancer) OR (cervical cancer) OR ((uterine) AND ((cervix) OR (cervical)) AND ((cancer) OR (tumour) OR (tumor) OR (neoplasm))) OR (((cervix) OR (cervical)) AND ((cancer) OR (tumour) OR (tumor) OR (neoplasm) OR (malignancy) OR (carcinoma) OR (adenocarcinoma)))) AND ((biomarker*) OR (biological marker*)).
